# Supplementary material
Source: PubMed Central journal article supplement (PMC6031307)
Supplement: NIHMS77045-supplement-Supplementary_notes_and_tables.pdf [file NIHMS77045-supplement-Supplementary_notes_and_tables.pdf]

## Supplementary note 1: Sorted subpopulations from the eye-antennal disc

To further investigate the decoupling of accessibility and activity of the Grh-enhancers, we performed ATAC-seq on FACS isolated progenitor cells that were marked by GFP expression driven by enhancers of the *optix* gene<sup>1</sup>. These cells constituted about half of the cells in eye-antennal discs at the time of harvesting (Fig. 4d). Reassuringly, we found that the *Optix2/3* enhancer is mainly accessible in the GFP positive (*Optix* expressing) sorted cells and not accessible across the GFP-negative tissue (Supplementary note Fig. 1a). Additionally, we identified 434 regions that were significantly more accessible (DESeq2  $\log_2FC > 0.5$ ,  $P_{adj} < 0.05$ ) in the *Optix* positive subpopulation, when compared to the rest of the tissue. The *Optix* motif (SIX family, Supplementary note Fig. 1b) was the top enriched motif (i-cisTarget, NES 19.9) found in 171 of these regions and the Sine-Oculus-ChIP-seq track was the most enriched track (NES 8.4). This clearly indicates that these regions are indeed specific to the *Optix* subpopulation, allowing us to identify potential *Optix* bound enhancers and their target genes, like for example enhancers near *frazzled* and *dpp* (Supplementary note Fig. 1c). All potential *Optix* target enhancers with their target genes can be found in Supplementary Table 4. Their area restricted accessibility is in sharp contrast to the Grh bound enhancers, which are similarly accessible in the sorted subpopulation compared to the rest of the tissue (Fig. 4e).

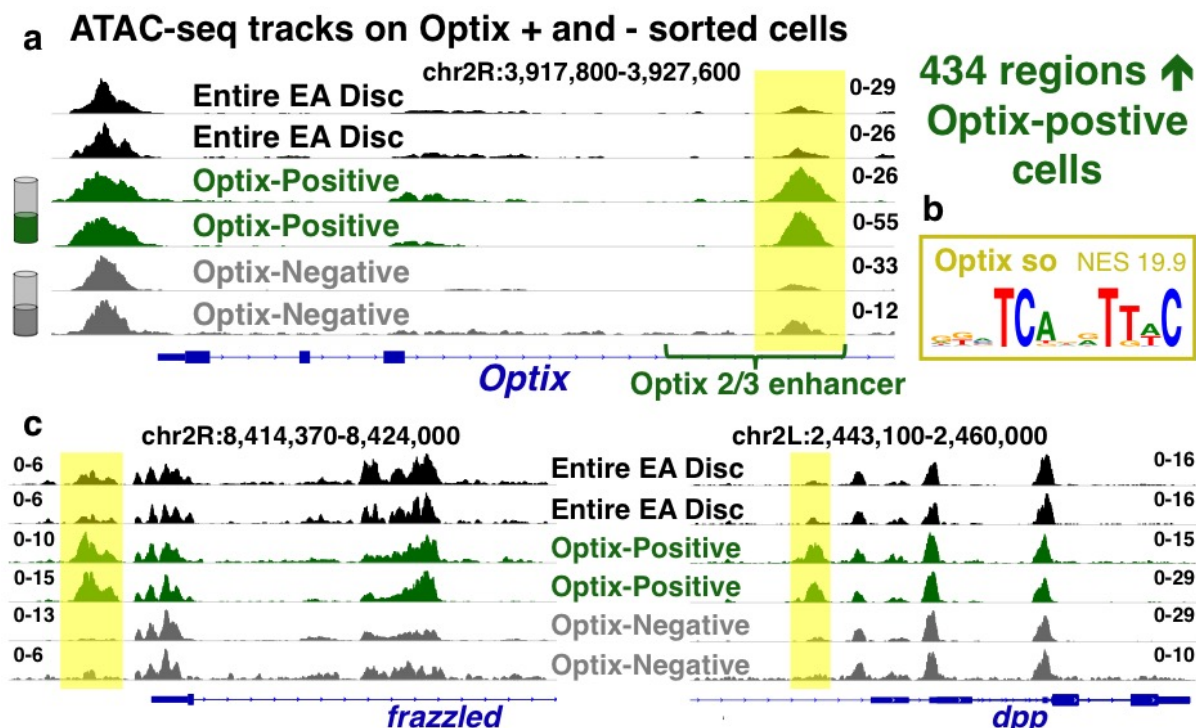

**Supplementary note Figure 1: ATAC-seq on sorted subpopulations of the eye-antennal disc** (a) Accessible chromatin profile of the *Optix2/3* enhancer for the entire discs (similar for 30 biological replicates), *Optix2/3* positive sorted bulk (2 biological replicates), single-cell aggregate and *Optix2/3* negative sorted bulk (2 biological replicates). (b) The top enriched motif (NES 19.9) annotated for *Optix* or Sine Oculus, in the 434 regions specifically more accessible in the *Optix* pos cells. (c) ATAC tracks with two examples of potential *Optix* target regions near *frazzled* and *dpp*.

## Supplementary note 2: Accessible chromatin landscape of larval brains

Intriguingly, except for the Grh target regions, the original accessible chromatin landscape of larval brains remains intact upon ectopic *grh* expression ( $\rho = 0.96$ ). The exact same motifs are enriched in the entire accessible chromatin landscapes of control and *grh* expressing larval brains, with very similar normalized enrichment scores (Supplementary note Fig. 2a). Specifically, motifs for the more general Trithorax-like<sup>2,3</sup> factor are again the strongest associated with open chromatin, followed by motifs linked to the pan-neuronal transcription factors Lola<sup>4</sup>, Tramtrack<sup>5</sup> and Sequoia<sup>6</sup>, which may play a similar role in neuronal tissues as Grh in epithelia. As an example, Supplementary note Fig. 2b shows the chromatin landscapes around *nervous fingers 1*, a gene coding for a protein involved in axon guidance<sup>7</sup>, and *scab*, a gene coding for a protein associated with cell adhesion and memory<sup>8</sup>. We observed no particular changes in chromatin accessibility, except for the Grh regions that became ectopically accessible.

**a**

| TF   | Motif | LB  | 18h<br><i>grh</i> | 24h<br><i>grh</i> | reg<br>up |
|------|-------|-----|-------------------|-------------------|-----------|
| Trl  |       | 7.9 | 7.9               | 8.2               | /         |
| Seq  |       | 5.8 | 5.6               | 5.5               | /         |
| m1   |       | 5.2 | 5.0               | 5.0               | /         |
| Lola |       | 4.3 | 4.3               | 4.2               | /         |
| Grh  |       | /   | 3.6               | 3.7               | 26.6      |

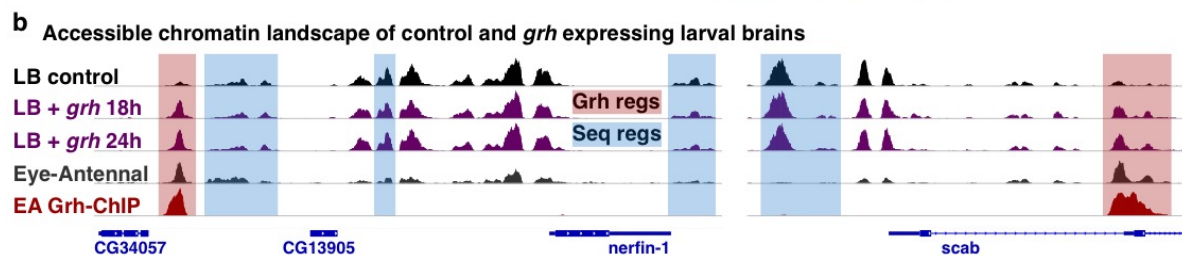

**Supplementary note Figure 2: Accessible chromatin landscape of control and *grh* expression larval brains** (a) Normalized enrichment scores from i-cisTarget<sup>9</sup> for motifs (Trithorax-like, Sequoia, motif1, Lola and Grh) enriched in the open chromatin landscape of control 3<sup>rd</sup> instar larval brains, 3<sup>rd</sup> instar larval brains with ectopic *grh* expression (18h and 24h) and regions that became accessible due to the ectopic *grh* expression ( $\log_2FC > 1$ ,  $pval < 0.05$ ). (b) Tracks visualizing ATAC-seq on control larval brains (black), larval brains with 18h and 24h *grh* expression (purple) (ATAC-seq experiments were done once for each time point) and eye-antennal discs (dark grey, 30 biological replicates), and Grh-ChIP on eye-antennal discs (dark-red, 3 biological replicates). Genomic loci near the neuronal *nerfin-1* and *scab* genes are shown with predicted Sequoia target regions (blue) and Grh target region (red).

### Supplementary note 3: Acute DNA damage-response enhancers in epithelial tissues

We showed in this work that lineage factors, like Grh, are responsible for setting up a large part of the accessible chromatin landscape of a tissue. Lineage factor target regions were mainly accessible “primed” throughout the entire tissue, made available for other factors to bind to generate tissue specific enhancer activity. There are however also other “types” of enhancers that are, or can be, activated in the cells of the epithelial tissues. To put our study concerning Grh as a lineage/pioneer factor into more perspective, we also investigated how the accessible chromatin of the cells in our tissue changed in response to acute damage, caused by ionizing radiation.

We irradiated (40 Grey) 3<sup>rd</sup> instar larvae of 15 different DGRP strains and performed 2 hours later ATAC-seq on the eye-antennal discs. We then compared the ATAC-seq profiles of eye-antennal discs after irradiation with the profiles of eye-antennal discs without radiation (Supplementary note Fig. 3a,b). Using DESeq2 we identified a relatively low number of regulatory regions that gained accessibility upon acute DNA damage. In total, we identified only 186 regions in the open chromatin landscape of eye-antennal discs that reproducibly gained accessibility ( $\log_2FC > 0.5$ ,  $P_{adj} < 0.01$ ) after ionizing radiation.

Using the motif enrichment tool i-cisTarget<sup>9</sup>, we identified some interesting motifs that were specifically enriched in these DNA damage responsive enhancers. The most enriched motif belonged to the AP-1 family of transcription factors (Supplementary note Fig. 3a), known to be generally activated in cells when they experience stress. The arguably most interesting motif, identified in 28 damage induced enhancers, was for the well-studied transcription factor and tumour suppressor protein p53 (Supplementary note Fig. 3b). Using public microarray data<sup>10</sup>, we confirmed that the expression of p53 was also significantly upregulated upon irradiation ( $\log_2FC=1.1$ ,  $P_{adj}<0.03$ ). Interestingly, these AP-1 and p53 bound enhancers were strongly associated with genes that are upregulated upon acute DNA damage caused by ionizing radiation<sup>10</sup> (Supplementary note Fig. 3c), suggesting that they are active enhancers.

Recent studies have demonstrated that for p53 responsive enhancers, p53 binding alone is sufficient to activate the enhancers without the requirement of other TFs to bind<sup>11</sup> and that p53 functions as a pioneer factor, capable of directly engaging and opening its target regions<sup>12</sup>. We can recapitulate the functions of p53 in the irradiated cells of our epithelial tissue. Though the large majority (>96%) of accessible regions in our tissues did not change upon acute DNA damage, p53 target regions became specifically accessible and activated the expression of nearby target genes.

Compared to the Grh target enhancers, these p53 responsive enhancers function differently. Both transcription factors have pioneering capacities, yet p53 is also capable of directly activating its target enhancers (fast response) while Grh is rather empowering a large group of regulatory regions (lineage factor), that seem to mostly require additional TFs to bind for activation. Investigating the effect of acute DNA damage on chromatin accessibility has allowed us to identify, in the same tissue, different types of regulatory regions that function and are activated by different mechanisms.

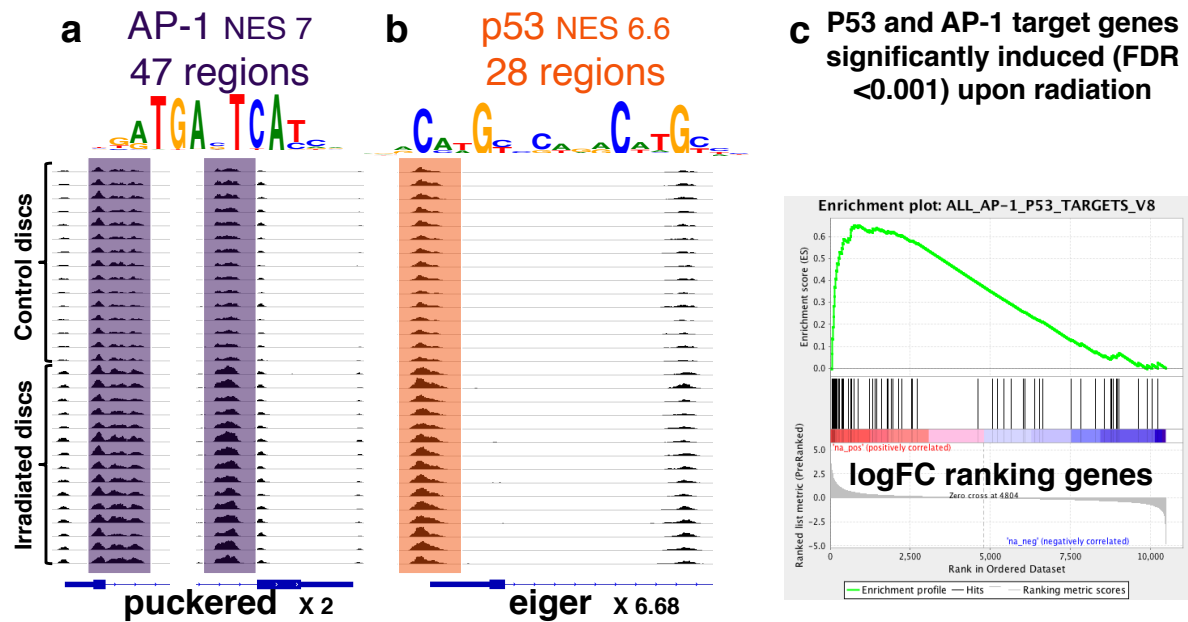

**Supplementary Note Figure 3: Open chromatin changes in response to acute damage, caused by ionizing radiation** (a) Motif for the AP-1 transcription factor with two induced AP-1 target intronic enhancers of *puckered*, a damage response gene that gets induced 2-fold. (b) Motif for the transcription factor p53 with an induced p53 target enhancer upstream of *eiger*, a gene upregulated 6.68-fold upon irradiation. (c) Gene Set Enrichment Analysis of the 62 potential target genes (black bars) of the p53 and AP-1 target regions (5kb upstream or intronic) on the gene ranking (10484 genes ranked by Log2FoldChange) of irradiated discs versus their controls. Genes that are upregulated upon irradiation are on the left (red) and genes that are down-regulated are on the right (blue).

### Supplementary Notes Bibliography

- Ostrin, E. J. *et al.* Genome-wide identification of direct targets of the Drosophila retinal determination protein Eyeless. *Genome Res.* **16**, 466–476 (2006).
- Bejarano, F. & Busturia, A. Function of the Trithorax-like gene during Drosophila development. *Dev. Biol.* **268**, 327–341 (2004).
- Farkas, G. *et al.* The Trithorax-like gene encodes the Drosophila GAGA factor. *Nature* **371**, 371806a0 (1994).
- Giniger, E., Tietje, K., Jan, L. Y. & Jan, Y. N. *lola* encodes a putative transcription factor required for axon growth and guidance in Drosophila. *Dev. Camb. Engl.* **120**, 1385–1398 (1994).
- Badenhorst, P. Tramtrack controls glial number and identity in the Drosophila embryonic CNS. *Dev. Camb. Engl.* **128**, 4093–4101 (2001).
- Brenman, J. E., Gao, F. B., Jan, L. Y. & Jan, Y. N. Sequoia, a tramtrack-related zinc finger protein, functions as a pan-neuronal regulator for dendrite and axon morphogenesis in Drosophila. *Dev. Cell* **1**, 667–677 (2001).
- Kuzin, A., Brody, T., Moore, A. W. & Odenwald, W. F. Nerfin-1 is required for early axon guidance decisions in the developing Drosophila CNS. *Dev. Biol.* **277**, 347–365 (2005).
- Grotewiel, M. S., Beck, C. D., Wu, K. H., Zhu, X. R. & Davis, R. L. Integrin-mediated short-term memory in Drosophila. *Nature* **391**, 455–460 (1998).
- Imrichová, H., Hulselmans, G., Kalender Atak, Z., Potier, D. & Aerts, S. i-cisTarget 2015 update: generalized cis-regulatory enrichment analysis in human, mouse and fly. *Nucleic Acids Res.* **43**, W57–W64 (2015).
- Bergeijk, P. van, Heimiller, J., Uyetake, L. & Su, T. T. Genome-Wide Expression Analysis Identifies a Modulator of Ionizing Radiation-Induced p53-Independent Apoptosis in Drosophila melanogaster. *PLOS ONE* **7**, e36539 (2012).
- Verfaillie, A. *et al.* Multiplex enhancer-reporter assays uncover unsophisticated TP53 enhancer logic. *Genome Res.* gr.204149.116 (2016). doi:10.1101/gr.204149.116
- Younger, S. T. & Rinn, J. L. p53 regulates enhancer accessibility and activity in response to DNA damage. *Nucleic Acids Res.* doi:10.1093/nar/gkx577

## Supplementary Tables

Supplementary table 1: Origin of the 18832 motifs

| Source                           | Reference                       | Organism(s)              | Type of motif                       | # motifs in v1.4               |
|----------------------------------|---------------------------------|--------------------------|-------------------------------------|--------------------------------|
| <b>Bergman</b>                   | (Down et al., 2007)             | Drosophila               | Curated (FlyReg)                    | 62                             |
| <b>C2H2-ZFs</b>                  | (Greenblatt et al., 2015)       | Human                    | B1H                                 | 64                             |
| <b>CIS-BP</b>                    | (Weirauch et al., 2014)         | Multiple species         | Experimental                        | 6523<br><i>(CIS-BP v1.02)</i>  |
| <b>Elemento</b>                  | (Elemento and Tavazoie, 2007)   | Drosophila, Human, Mouse | Predicted (conserved) <sub>om</sub> | 619                            |
|                                  | (Elemento and Tavazoie, 2005)   |                          |                                     |                                |
| <b>FactorBook</b>                | (Wang et al., 2012)             | Human                    | ENCODE ChIP-seq                     | 82                             |
| <b>FlyFactorSurvey</b>           | (Enuameh et al., 2013)          | Drosophila               | B1H, others (e.g., FlyReg)          | 688<br><i>(includes Wolfe)</i> |
|                                  | (Zhu et al., 2011)              |                          |                                     |                                |
|                                  | (Xie et al., 2010)              |                          |                                     |                                |
| <b>hPDI</b>                      | (Hu et al., 2009)               | Human                    | Experimental                        | 437                            |
| <b>HOCOMOCO</b>                  | (Kulakovskiy et al., 2016)      | Human and mouse          | ChIP-seq, HT-SELEX, curated         | 426<br><i>(HOCOMOCO v9)</i>    |
|                                  | (Kulakovskiy et al., 2013)      |                          |                                     |                                |
| <b>HOMER</b>                     | (Heinz et al., 2010)            | Multiple species         | ChIP-seq, others (e.g. ENCODE)      | 307                            |
| <b>iDMMPMM</b>                   | (Kulakovskiy and Makeev, 2009)  | Drosophila               | DNase I footprints, SELEX, B1H      | 39                             |
| <b>JASPAR</b>                    | (Mathelier et al., 2016)        | Multiple species         | Curated                             | 593<br><i>(JASPAR 2014 nr)</i> |
|                                  | (Lim et al., 2014)              |                          |                                     |                                |
|                                  | (Portales-Casamar et al., 2010) |                          |                                     |                                |
| <b>Neph</b>                      | (Neph et al., 2012)             | Human                    | Predicted (from DHS) <sub>om</sub>  | 683                            |
| <b>PreDREM</b>                   | (Zheng et al., 2015)            | Human                    | Predicted                           | 538                            |
| <b>ScerTF</b>                    | (Spivak et al., 2012)           | Saccharomyces            | Curated plus ChIP-seq               | 196                            |
| <b>Stark</b>                     | (Stark et al., 2007)            | Drosophila               | Predicted (conserved) <sub>om</sub> | 232                            |
|                                  | (Pachkov et al., 2013)          |                          |                                     |                                |
| <b>SwissRegulon</b>              | (Pachkov et al., 2007)          | Multiple species         | Curated                             | 538                            |
| <b>Taipale</b>                   | (Jolma et al., 2013)            | Human                    | HT-SELEX                            | 581                            |
| <b>Taipale TF pairs</b>          | (Jolma et al., 2015)            | Human                    | CAP-SELEX                           | 664                            |
| <b>TF dimers</b>                 | (Jankowski et al., 2013)        | Human                    | Predicted dimers                    | 603                            |
| <b>Tiffin</b>                    | (Down et al., 2007)             | Drosophila               | Predicted (gene sets) <sub>om</sub> | 120                            |
| <b>TRANSFAC® PRO</b>             | (Matys et al., 2006)            | Multiple species         | Curated, ChIP-chip                  | 5145<br><i>(TFP2015.3)</i>     |
| <b>TRANSFAC® 7.0 Public 2005</b> | (Matys et al., 2006)            | Multiple species         | Curated, ChIP-chip                  | 398                            |
| <b>YeTFaSCo</b>                  | (de Boer and Hughes, 2012)      | Saccharomyces            | Uniprobe, Curated, ChIP-chip        | 244                            |
| <b>Total</b>                     |                                 |                          |                                     | 21586<br>18832 motifs          |

Supplementary table 2: Gene Ontology terms for the 1786 potential Grh target genes.

| GO term on 1786 genes near Grh target regions (flymine.org)        | p-Value (H) | Matches | ImaGO Term (flymine.org)                      | p-Value (Hyp) | Matches |
|--------------------------------------------------------------------|-------------|---------|-----------------------------------------------|---------------|---------|
| organ development [GO:0048513]                                     | 2,85E-74    | 425     | embryonic dorsal epidermis                    | 2,00E-90      | 345     |
| multicellular organismal development [GO:0007275]                  | 1,78E-65    | 679     | embryonic ventral epidermis                   | 5,54E-75      | 304     |
| system development [GO:0048731]                                    | 5,82E-64    | 583     | embryonic head epidermis                      | 2,91E-51      | 223     |
| anatomical structure morphogenesis [GO:0009653]                    | 1,08E-62    | 487     | dorsal epidermis primordium                   | 8,21E-40      | 168     |
| tube development [GO:0035295]                                      | 4,32E-62    | 292     | embryonic epipharynx                          | 1,25E-37      | 156     |
| organ morphogenesis [GO:0009887]                                   | 4,63E-62    | 298     | embryonic foregut                             | 1,96E-33      | 177     |
| morphogenesis of an epithelium [GO:0002009]                        | 8,30E-59    | 259     | ventral epidermis primordium                  | 1,47E-29      | 139     |
| tissue development [GO:0009888]                                    | 9,43E-58    | 373     | dorsal ectoderm primordium                    | 7,80E-29      | 134     |
| tissue morphogenesis [GO:0048729]                                  | 1,13E-57    | 261     | embryonic esophagus                           | 1,44E-26      | 101     |
| epithelium development [GO:0060429]                                | 1,74E-57    | 345     | dorsal ectoderm anlage in statu nascendi      | 4,56E-23      | 114     |
| single-organism developmental process [GO:0044767]                 | 7,56E-55    | 742     | embryonic/larval posterior spiracle           | 4,81E-22      | 104     |
| post-embryonic organ development [GO:0048569]                      | 1,33E-54    | 221     | ventral ectoderm anlage in statu nascendi     | 2,86E-21      | 104     |
| developmental process [GO:0032502]                                 | 1,64E-53    | 745     | embryonic/larval tracheal system              | 4,19E-21      | 122     |
| tube morphogenesis [GO:0035239]                                    | 2,18E-53    | 227     | clypeo-labral primordium                      | 1,10E-15      | 70      |
| post-embryonic development [GO:0009791]                            | 5,36E-53    | 248     | procephalic ectoderm anlage in statu nascendi | 5,05E-15      | 94      |
| anatomical structure development [GO:0048856]                      | 1,53E-52    | 691     | ventral ectoderm primordium                   | 1,18E-14      | 108     |
| imaginal disc development [GO:0007444]                             | 4,54E-52    | 247     | tracheal primordium                           | 1,43E-14      | 78      |
| epithelial tube morphogenesis [GO:0060562]                         | 3,69E-51    | 216     | foregut primordium                            | 5,34E-14      | 129     |
| single-multicellular organism process [GO:0044707]                 | 2,76E-49    | 729     | ventral ectoderm primordium P2                | 4,98E-13      | 124     |
| imaginal disc morphogenesis [GO:0007560]                           | 3,17E-49    | 197     | procephalic ectoderm anlage                   | 5,67E-12      | 110     |
| post-embryonic organ morphogenesis [GO:0048563]                    | 3,17E-49    | 197     | embryonic hindgut                             | 7,57E-12      | 228     |
| post-embryonic morphogenesis [GO:0009886]                          | 6,24E-49    | 203     | anlage in statu nascendi                      | 1,10E-10      | 75      |
| instar larval or pupal morphogenesis [GO:0048707]                  | 1,00E-48    | 200     | posterior spiracle specific anlage            | 1,28E-10      | 40      |
| metamorphosis [GO:0007552]                                         | 3,70E-48    | 206     | embryonic proventriculus                      | 8,27E-09      | 110     |
| instar larval or pupal development [GO:0002165]                    | 1,06E-47    | 224     | procephalic ectoderm primordium               | 2,19E-08      | 125     |
| appendage development [GO:0048736]                                 | 2,54E-44    | 177     | clypeolabrum primordium P2                    | 3,78E-08      | 27      |
| appendage morphogenesis [GO:0035107]                               | 5,59E-44    | 175     | head epidermis primordium P1                  | 1,05E-07      | 36      |
| imaginal disc-derived appendage morphogenesis [GO:0035114]         | 8,29E-44    | 174     | clypeolabrum                                  | 1,32E-07      | 26      |
| imaginal disc-derived appendage development [GO:0048737]           | 8,41E-44    | 175     | hindgut proper primordium                     | 1,62E-07      | 153     |
| post-embryonic appendage morphogenesis [GO:0035120]                | 6,12E-43    | 171     | clypeolabrum anlage                           | 1,96E-07      | 22      |
| wing disc development [GO:0035220]                                 | 5,66E-41    | 186     | embryonic/larval visceral branch              | 5,79E-07      | 27      |
| biological regulation [GO:0065007]                                 | 3,69E-40    | 729     | clypeolabrum anlage in statu nascendi         | 7,21E-07      | 19      |
| neuron differentiation [GO:0030182]                                | 1,43E-39    | 260     | hindgut anlage in statu nascendi              | 7,68E-07      | 35      |
| locomotion [GO:0040011]                                            | 4,80E-38    | 209     | head epidermis dorsal                         | 2,83E-06      | 38      |
| generation of neurons [GO:0048699]                                 | 1,04E-37    | 273     | ventral epidermis primordium P2               | 4,34E-06      | 17      |
| imaginal disc-derived wing morphogenesis [GO:0007476]              | 2,86E-37    | 150     | embryonic/larval dorsal trunk                 | 4,87E-06      | 37      |
| wing disc morphogenesis [GO:0007472]                               | 6,57E-37    | 151     | atrium primordium                             | 1,53E-05      | 28      |
| multicellular organismal process [GO:0032501]                      | 2,12E-36    | 763     | proventriculus primordium                     | 2,13E-05      | 35      |
| pattern specification process [GO:0007389]                         | 2,70E-36    | 191     | visual primordium                             | 2,15E-05      | 37      |
| regulation of cellular process [GO:0050794]                        | 2,96E-34    | 626     | visual anlage                                 | 2,66E-05      | 27      |
| regulation of biological process [GO:0050789]                      | 1,33E-33    | 665     | visual anlage in statu nascendi               | 7,46E-05      | 26      |
| single-organism process [GO:0044699]                               | 1,01E-32    | 1128    | embryonic anal pad                            | 1,47E-05      | 96      |
| neuron development [GO:0048666]                                    | 3,32E-31    | 221     | mesectoderm primordium                        | 1,27E-04      | 31      |
| sensory organ development [GO:0007423]                             | 1,29E-30    | 172     | amnioserosa                                   | 1,44E-04      | 83      |
| cell morphogenesis involved in differentiation [GO:0000904]        | 4,47E-29    | 175     | gap                                           | 2,88E-04      | 34      |
| regionalization [GO:0003002]                                       | 5,51E-29    | 168     | midline primordium                            | 3,11E-04      | 38      |
| cell development [GO:0048468]                                      | 7,89E-29    | 368     | amnioserosa anlage in statu nascendi          | 4,80E-04      | 25      |
| movement of cell or subcellular component [GO:0006928]             | 2,67E-28    | 197     | segmentally repeated                          | 5,48E-04      | 24      |
| cell projection organization [GO:0030030]                          | 4,50E-28    | 215     | sensory system head                           | 6,83E-04      | 83      |
| taxis [GO:0042330]                                                 | 1,36E-26    | 128     | dorsal ectoderm anlage                        | 7,36E-04      | 15      |
| embryo development [GO:0009790]                                    | 1,99E-26    | 175     | embryonic optic lobe primordium               | 8,94E-04      | 26      |
| nervous system development [GO:0007399]                            | 3,54E-26    | 379     | embryonic/larval dorsal vessel                | 0,001252      | 39      |
| cell morphogenesis involved in neuron differentiation [GO:0048569] | 4,89E-26    | 160     | embryonic optic lobe                          | 0,001848      | 26      |
| neuron projection development [GO:0031175]                         | 5,49E-26    | 183     | embryonic dorsal apodeme                      | 0,001872      | 21      |
| chemotaxis [GO:0006935]                                            | 1,89E-25    | 112     | amnioserosa anlage                            | 0,002119      | 23      |
| cellular component morphogenesis [GO:0032989]                      | 7,41E-25    | 243     | hypopharynx primordium P1                     | 0,002723      | 16      |
| cell morphogenesis [GO:0000902]                                    | 8,30E-25    | 220     | dorsal epidermis anlage                       | 0,004789      | 15      |
| neuron projection morphogenesis [GO:0048812]                       | 9,11E-25    | 177     | ectoderm anlage in statu nascendi             | 0,005313      | 24      |
| respiratory system development [GO:0060541]                        | 9,87E-25    | 101     | mesoderm anlage in statu nascendi             | 0,006267      | 34      |
| regulation of transcription, DNA-templated [GO:0006355]            | 1,12E-24    | 242     | stomatogastric nervous system primordium      | 0,009153      | 21      |
| regulation of nucleic acid-templated transcription [GO:1903506]    | 1,12E-24    | 242     | inclusive hindgut primordium                  | 0,011744      | 76      |
| regulation of RNA biosynthetic process [GO:2001141]                | 1,12E-24    | 242     | pars intercerebralis primordium               | 0,012454      | 16      |
| cell differentiation [GO:0030154]                                  | 1,68E-24    | 479     | embryonic ventral apodeme                     | 0,014839      | 18      |
| cellular developmental process [GO:0048869]                        | 3,69E-24    | 494     | gnathal lobes anlage                          | 0,02094       | 10      |
| axon guidance [GO:0007411]                                         | 1,82E-23    | 104     | embryonic stomatogastric nervous system       | 0,021006      | 22      |
| neuron projection guidance [GO:0097485]                            | 2,65E-23    | 106     | embryonic leading edge cell                   | 0,025184      | 13      |
| open tracheal system development [GO:0007424]                      | 1,02E-22    | 95      | embryonic rectum                              | 0,025397      | 21      |
| axon development [GO:0061564]                                      | 1,12E-22    | 119     | embryonic foregut sensory structure           | 0,031641      | 18      |
| regulation of RNA metabolic process [GO:0051252]                   | 2,83E-22    | 251     | hypopharynx anlage                            | 0,034925      | 9       |
| response to stimulus [GO:0050896]                                  | 6,80E-22    | 549     | amnioserosa primordium                        | 0,035079      | 25      |
| cell projection morphogenesis [GO:0048858]                         | 2,00E-21    | 183     | head epidermis lateral primordium P2          | 0,041676      | 10      |
| axonogenesis [GO:0007409]                                          | 4,22E-21    | 114     | antennal primordium1                          | 0,043735      | 16      |

Supplementary table 3: Tested Grh bound enhancers

| <b>Bloominton number</b> | <b>Active in EA</b> | <b>position_dm3</b>     | <b>closest gene</b> |
|--------------------------|---------------------|-------------------------|---------------------|
| 38727                    | yes                 | chr2L:17266203-17270147 | <i>beat-IIIc</i>    |
| 38758                    | yes                 | chr2R:20898026-20898872 | <i>Zip</i>          |
| 40432                    | yes                 | chr2R:7074512-7077884   | <i>shn</i>          |
| 40436                    | yes                 | chr2R:7081197-7084847   | <i>shn</i>          |
| 45151                    | yes                 | chr2L:8277657-8281321   | <i>Btk29A</i>       |
| 45275                    | no                  | chr2R:13692354-13695691 | <i>grh</i>          |
| 45531                    | yes                 | chr2R:6021498-6023006   | <i>gem</i>          |
| 45723                    | yes                 | chr3R:16367700-16370556 | <i>Stat92E</i>      |
| 45745                    | yes                 | chr3R:6411558-6415522   | <i>hth</i>          |
| 46823                    | yes                 | chr3L:10993794-10997681 | <i>klu</i>          |
| 47361                    | no                  | chr3R:6419287-6423188   | <i>hth</i>          |
| 47530                    | yes                 | chrX:6876110-6879886    | <i>ogre</i>         |
| 47714                    | no                  | chr3L:16630877-16634655 | <i>abl</i>          |
| 47890                    | no                  | chr2L:6536075-6538679   | <i>eya</i>          |
| 48037                    | yes                 | chr2R:17439112-17442366 | <i>Egfr</i>         |
| 48457                    | yes                 | chr2L:5294138-5297840   | <i>vri</i>          |
| 48944                    | no                  | chr3R:20121542-20125543 | <i>crb</i>          |
| 49542                    | no                  | chr2R:9826145-9829599   | <i>shot</i>         |
| 49785                    | yes                 | chr4:79419-83379        | <i>ci</i>           |
| 50129                    | yes                 | chr2L:21242267-21245864 | <i>Hr39</i>         |
| 50233                    | yes                 | chr3R:19157220-19160884 | <i>pnt</i>          |

Supplementary table 4: Potential Optix target enhancers (selectively accessible + motif)

| chr   | start    | end      | potential target gene   | chr   | start    | end      | potential ta      |
|-------|----------|----------|-------------------------|-------|----------|----------|-------------------|
| chr2L | 16470889 | 16471855 | <i>dac</i>              | chr2R | 14457912 | 14460206 | <i>CG30115</i>    |
| chr2L | 15457257 | 15458263 |                         | chr2R | 15917206 | 15919494 |                   |
| chr2L | 2446779  | 2447902  | <i>dpp</i>              | chr2R | 14785308 | 14786687 | <i>sano snoRl</i> |
| chr2R | 8414916  | 8416403  | <i>fra</i>              | chr3L | 17968313 | 17970080 | <i>Eip75B</i>     |
| chrX  | 4472146  | 4473898  |                         | chr2L | 21971546 | 21972144 |                   |
| chr2R | 5547784  | 5548876  | <i>Mmp2 tRNA:M3:46A</i> | chr3R | 20984237 | 20986626 |                   |
| chrX  | 5890195  | 5891426  |                         | chr2R | 15721484 | 15722613 |                   |
| chr2L | 14431040 | 14432054 |                         | chr3R | 27512865 | 27513729 |                   |
| chr3L | 6303429  | 6305541  |                         | chr3R | 14201327 | 14203344 | <i>gl</i>         |
| chrX  | 4477268  | 4478390  |                         | chr3L | 19418437 | 19418995 | <i>CR32205</i>    |
| chr2L | 8851927  | 8852855  |                         | chr2R | 19551045 | 19553143 | <i>Pde8</i>       |
| chr3R | 23052297 | 23053428 | <i>CG42813</i>          | chr2L | 18381469 | 18382635 | <i>Fas3</i>       |
| chrX  | 17429553 | 17430600 | <i>CG12432</i>          | chr3R | 9612482  | 9614066  |                   |
| chr2R | 3931209  | 3931878  |                         | chr3R | 15140203 | 15141727 | <i>DI</i>         |
| chr3L | 18223443 | 18224703 |                         | chr3R | 23378816 | 23379810 | <i>Klp98A</i>     |
| chr2R | 11786454 | 11790005 | <i>CG33463 sli</i>      | chr2L | 9592105  | 9595065  |                   |
| chr2L | 14429565 | 14431039 | <i>Cpr35B</i>           | chr3L | 8005102  | 8005606  | <i>nmo</i>        |
| chr2R | 3925690  | 3927150  | <i>Optix</i>            | chr3L | 22150918 | 22151819 | <i>ollf413</i>    |
| chr2R | 19553558 | 19554775 | <i>Pde8</i>             | chr2R | 20991183 | 20991836 | <i>CG16778</i>    |
| chr2L | 19216521 | 19217610 |                         | chr3L | 20087382 | 20088182 |                   |
| chr3R | 4712706  | 4713321  | <i>pyd</i>              | chr3L | 15702497 | 15703916 |                   |
| chr3L | 14185008 | 14186191 | <i>nuf</i>              | chr2R | 17983153 | 17985722 | <i>CG11073</i>    |
| chr2L | 14514797 | 14515778 | <i>tRNA:G3:35Ba</i>     | chr3R | 17651151 | 17652227 | <i>CASK</i>       |
| chr3L | 10395857 | 10396490 |                         | chr3R | 25130763 | 25131838 |                   |
| chr3R | 26393147 | 26393800 | <i>tmod</i>             | chr2L | 2430126  | 2431137  | <i>dpp</i>        |
| chr2L | 20020018 | 20020681 | <i>CG13966</i>          | chr3R | 685505   | 686724   | <i>opa</i>        |
| chr3L | 13401397 | 13402644 |                         | chr3L | 7539322  | 7540485  | <i>CG32376</i>    |
| chr2L | 7309636  | 7312092  | <i>wg</i>               | chr3L | 14427628 | 14428825 | <i>bbg</i>        |
| chr2R | 17413790 | 17414354 | <i>Egfr</i>             | chr3L | 15705761 | 15707835 | <i>CG42571</i>    |
| chr3L | 14952805 | 14954318 |                         | chr3R | 24902930 | 24905176 | <i>CG11873</i>    |
| chr3R | 9796351  | 9796673  | <i>rdx</i>              | chr2L | 676290   | 677417   | <i>ds</i>         |
| chr3R | 12162999 | 12164383 | <i>Sulf1</i>            | chr2L | 2479903  | 2481112  |                   |
| chr2R | 6006047  | 6006983  | <i>CG11866</i>          | chr3R | 21470765 | 21472589 | <i>jigr1</i>      |
| chr3L | 12423362 | 12425175 | <i>toe</i>              | chr3R | 17749240 | 17750037 |                   |
| chr2R | 5652902  | 5654069  | <i>CG1688 trpl</i>      | chr3L | 1367754  | 1368355  | <i>ru Ptp61F</i>  |
| chr2R | 17805760 | 17806436 | <i>Fili</i>             | chr2L | 12607871 | 12609559 | <i>nub</i>        |
| chrX  | 13803381 | 13804542 |                         | chr3L | 5345899  | 5347136  | <i>lama</i>       |
| chr3L | 20928615 | 20929765 | <i>fng</i>              | chrX  | 17463168 | 17464552 | <i>ppk23</i>      |
| chr3L | 22390952 | 22393902 | <i>Ten-m</i>            | chr3L | 18622487 | 18623301 | <i>MYPT-75D</i>   |
| chr3R | 12345258 | 12349333 | <i>CG42342</i>          | chr3L | 14998162 | 14998928 | <i>Reck</i>       |
| chr2L | 15340986 | 15342260 |                         | chr3L | 1591278  | 1592404  | <i>CG13917</i>    |
| chr3R | 5325301  | 5326919  | <i>RhoL</i>             | chr3L | 8215941  | 8217105  | <i>CG13678</i>    |
| chr2L | 636706   | 637539   |                         | chrX  | 13814278 | 13816189 |                   |
| chr3L | 3430902  | 3432203  | <i>elF5B</i>            | chrX  | 16818597 | 16819944 | <i>CG4928</i>     |
| chr2L | 4055663  | 4056929  | <i>ed</i>               | chr2R | 16057175 | 16058629 |                   |
| chr3L | 22402850 | 22403968 | <i>Ten-m</i>            | chr2R | 15724428 | 15726237 |                   |
| chr3L | 21121373 | 21122444 | <i>ko</i>               | chr3R | 6388869  | 6390199  | <i>hth</i>        |
| chr3R | 5894294  | 5895466  | <i>nerfin-2</i>         | chr2R | 10317480 | 10319412 | <i>phyl</i>       |
| chr3R | 4108630  | 4109603  | <i>CG11671</i>          | chr2R | 3428644  | 3429569  | <i>Corin CG15</i> |
| chr2L | 3848811  | 3849903  |                         | chr3L | 18191009 | 18192026 | <i>CG7320</i>     |
| chr3L | 13390554 | 13392484 | <i>sens</i>             | chr3R | 19163708 | 19164962 | <i>pnt</i>        |
| chr2L | 16441421 | 16442467 | <i>CG5888 ldgf1</i>     | chr3R | 929591   | 930522   |                   |
| chrX  | 3480966  | 3481711  | <i>AlstR</i>            | chr3R | 20235929 | 20237705 | <i>nAcRalpha</i>  |
| chr3L | 8907768  | 8909625  | <i>mfr Tsp66E</i>       | chr3R | 2519180  | 2521186  | <i>Ccp84Ac C</i>  |
| chr3L | 6429469  | 6430429  | <i>CG42747</i>          | chr2L | 16461199 | 16463237 |                   |
| chrX  | 17236082 | 17236710 |                         | chr2R | 16058630 | 16059655 |                   |
| chr3L | 12091166 | 12092166 |                         | chr3R | 23607351 | 23609705 | <i>CG34353</i>    |
| chr2R | 8849528  | 8850222  |                         | chr3R | 25131839 | 25134257 |                   |
| chr2R | 3901825  | 3903497  | <i>CG14762</i>          | chr3R | 2048371  | 2049818  | <i>Osi5 Osi4</i>  |
| chr3R | 491056   | 492218   | <i>CG31531</i>          | chr3L | 2414558  | 2415719  | <i>CG42669</i>    |
| chr2R | 7717941  | 7719056  | <i>Sobp</i>             | chr3L | 17927589 | 17928655 | <i>CG43174 C</i>  |
| chr3L | 13135344 | 13136253 |                         | chrX  | 10432701 | 10433332 | <i>spr1</i>       |
| chr2R | 4625100  | 4628545  | <i>CG8740 CG42615</i>   | chr2R | 18936907 | 18938229 | <i>CG30194</i>    |
| chrX  | 7248773  | 7249494  | <i>CG1999 CG1677</i>    | chr2R | 17259706 | 17260794 | <i>cv-2</i>       |
| chr2R | 18210530 | 18212167 | <i>Gp150</i>            | chrX  | 13131758 | 13132733 | <i>CG32639 m</i>  |
| chr3R | 19145518 | 19146845 | <i>pnt</i>              | chrX  | 4499002  | 4500280  |                   |
| chr2L | 7326571  | 7327893  |                         | chr2L | 5234468  | 5235628  | <i>tkv</i>        |
| chr3R | 27308883 | 27319419 |                         | chr2L | 14215650 | 14217850 | <i>smi35A</i>     |
| chr2R | 15991469 | 15995776 | <i>18w</i>              | chr3L | 20919973 | 20920808 | <i>fng</i>        |
| chrX  | 18894876 | 18896035 | <i>CG42506 CG32541</i>  | chr2L | 10886086 | 10887153 |                   |
| chr3R | 4849567  | 4850223  | <i>neur</i>             | chr3L | 7095378  | 7097265  | <i>form3</i>      |
| chr3R | 13387092 | 13389664 | <i>Hmx</i>              | chrX  | 4338311  | 4339563  | <i>bi</i>         |
| chrX  | 18841084 | 18842265 | <i>CG42506 CG32541</i>  | chr3R | 9084867  | 9085753  | <i>Ace CG116</i>  |
| chr3L | 15799717 | 15801517 | <i>CG6244</i>           | chr2R | 13208217 | 13209937 | <i>mbl</i>        |
| chr3L | 7607547  | 7608640  | <i>CG33275</i>          | chr2R | 10307177 | 10308543 | <i>CG17386</i>    |
| chr3L | 7128581  | 7129348  | <i>melt</i>             | chr3R | 26391854 | 26393146 | <i>tmod</i>       |
| chr3R | 10319815 | 10322304 |                         | chr2L | 18556216 | 18557427 | <i>Pde11</i>      |
| chr2R | 15985377 | 15986851 |                         | chr3R | 22049724 | 22051698 | <i>CG12290</i>    |
| chr2R | 12276701 | 12280114 | <i>CG33960</i>          | chr3R | 6642834  | 6646482  | <i>CG4089</i>     |
| chr3R | 19123471 | 19125359 | <i>pnt</i>              | chrX  | 15441071 | 15442654 |                   |
| chr3L | 18443846 | 18445152 |                         | chr2R | 5584849  | 5586283  | <i>Uba1</i>       |
| chr3R | 17268122 | 17270806 | <i>lbe</i>              | chr2L | 16210401 | 16211587 | <i>CG31819</i>    |
| chr3R | 9645435  | 9647520  |                         | chr3L | 10382051 | 10383538 |                   |
| chr3L | 3742875  | 3744940  | <i>CG32264</i>          | chr3R | 19285089 | 19289218 | <i>CG4374</i>     |
| chr3R | 12322167 | 12323064 | <i>Cad89D</i>           | chr2R | 17412577 | 17413789 | <i>Egfr</i>       |
| chr2L | 15929049 | 15929718 | <i>beat-lb</i>          |       |          |          |                   |



Supplementary table 5: Co-conserved motifs using the Branch Length Score

| Motif                                                                                                                                 | potential TF | BLS    | BLS_shuffled | Delta_BLS |
|---------------------------------------------------------------------------------------------------------------------------------------|--------------|--------|--------------|-----------|
| 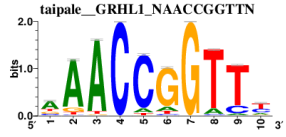 <p>taipale_GRHL1NAACCGGTTN</p>                      | grh          | 3499,2 | 128.197      | 3371      |
|  <p>hdpi_STUB1</p>                                   | STUB1        | 1.867  | 251.001      | 1615.72   |
|  <p>hdpi_YEATS4</p>                                  | Gas41        | 1.772  | 311.729      | 1460.44   |
|  <p>transfac_pro_M01216</p>                          | foxo slp2    | 1.619  | 212.037      | 1406.72   |
|  <p>hocomoco_BPTF_si</p>                            | E(bx)        | 1.529  | 133.4        | 1395.79   |
|  <p>stark_MAACAA</p>                               | Aef1         | 1556,8 | 231.784      | 1324.98   |
|  <p>flyfactorsurvey_jim_SANGER_2.5_FBgn0027339</p> | jim          | 1.288  | 93.16        | 1194.5    |
|  <p>hdpi_MYEF2</p>                                 | rump         | 1.356  | 220.157      | 1135.84   |
|  <p>hdpi_CSTF2</p>                                 | CstF-64      | 1.161  | 112.537      | 1048.06   |
|  <p>transfac_pro_M03849</p>                        | Sox14        | 1.082  | 95.596       | 986.673   |
|  <p>hdpi_MGC10433</p>                              | CG2931       | 1.130  | 169.677      | 960.574   |

|             |                                                                                     |        |       |         |         |
|-------------|-------------------------------------------------------------------------------------|--------|-------|---------|---------|
| hdpi_ZRSR2  | 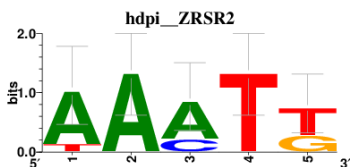   | CG3294 | 1.059 | 110.648 | 947.903 |
| hdpi_ABCF2  |    | CG9281 | 990   | 107.387 | 882.672 |
| cisbp_M0178 |    | ato    | 1.043 | 163.614 | 879.413 |
| cisbp_M4959 |    | exd    | 941   | 109.429 | 832.062 |
| hdpi_DDX53  |   | CG7878 | 925   | 100.24  | 825.018 |
| hdpi_RBM35B |  | fus    | 959   | 165.567 | 793.256 |
| cisbp_M2014 |  | Trl    | 924   | 137.079 | 787.267 |
| cisbp_M4778 |  | br     | 1.003 | 246.683 | 756.403 |
| hdpi_GTF2B  |  | TfIIIB | 938   | 220.096 | 717.448 |
| hdpi_HSF1   |  | Hsf    | 959   | 242.41  | 716.729 |

Supplementary table 6: Primers for genomic PCR of Grh target enhancers with caQTLs

| Regions  | chr   | Start     | End       | Accessible | Closed | Forward Primer           | Reverse Primer       |
|----------|-------|-----------|-----------|------------|--------|--------------------------|----------------------|
| Region 1 | chr3R | 25441420  | 25442766  | 28123      | 25208  | GTTTAAGGAGCTTCTGCTGCAT   | GGCGCCATCCATTCCATCA  |
| Region 2 | chr2L | 7,699,491 | 7,700,491 | 28123      | 25208  | TCCGACCCATCGAATGATGC     | TGTCCACAAGGCAGATGGTC |
| Region 3 | chr3L | 12908700  | 12909400  | 28123      | 25208  | TCTCAGGATCCCTGCCATTA     | ATTAATTGGCACACGCCGC  |
| Region 4 | chr2L | 20114900  | 20115700  | 28222      | 25208  | ACAAATAACACCGACGTTTTCACT | CGAGGTTCGACCCCAACTAT |
